# Supplementary material
Source: PubMed Central journal article supplement (PMC5487608)
Supplement: AAC.00070-17_zac007176291s1.pdf [file AAC.00070-17_zac007176291s1.pdf]

## **Supplemental Materials for**

**Pyrazinoic Acid Inhibits a Bifunctional Enzyme in *Mycobacterium tuberculosis***

**Moses Njire<sup>1,2</sup>, Na Wang<sup>1,4</sup>, Bangxing Wang<sup>1</sup>, Yaoju Tan<sup>3</sup>, Xingshan Cai<sup>3</sup>, Yanwen  
Liu<sup>3</sup>, Julius Mugweru<sup>1,2</sup>, Jintao Guo<sup>1</sup>, H.M. Adnan Hameed<sup>1,2</sup>, Shouyong Tan<sup>3</sup>,  
Jianxiong Liu<sup>3</sup>, Wing Wai Yew<sup>5</sup>, Eric Nuermberger<sup>6</sup>, Gyanu Lamichhane<sup>6</sup>, Jinsong  
Liu<sup>1,2</sup>, Tianyu Zhang<sup>1,2#</sup>**

\*To whom correspondence should be addressed. Email: zhang\_tianyu@gibh.ac.cn

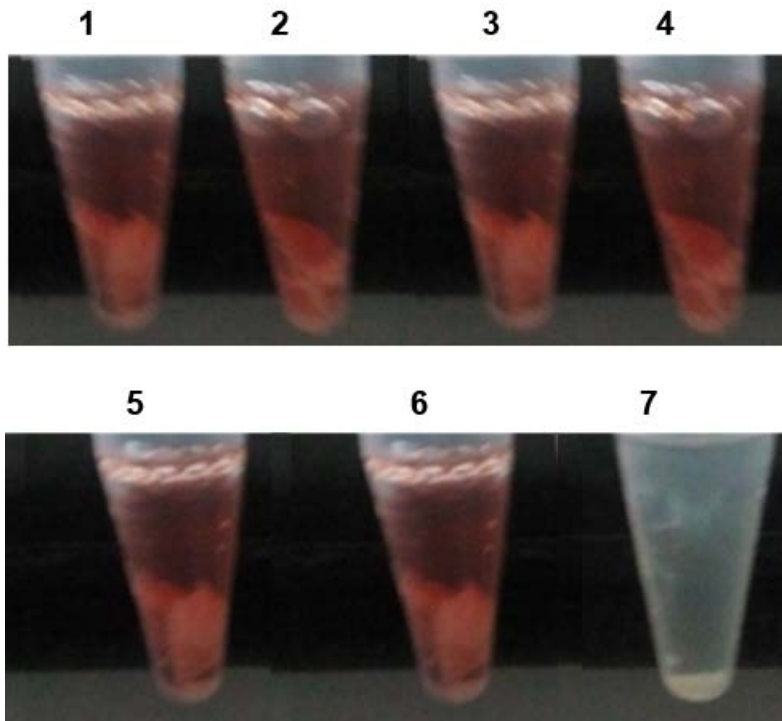

**Figure S1: PZase enzyme assay.** *M. tuberculosis* recombinant strains (1-3): (1) Wild-type Rv2783; (2) Rv2783<sub>Asp67Asn</sub> mutant; (3) Hsp60 vector control; (4) *M. tuberculosis* H37Rv parental strain; (5-6) PZA-resistant clinical strains harboring the G199A mutation in Rv2783c; (7) *M. bovis* Bacillus Calmette-Guérin (BCG) Tice.

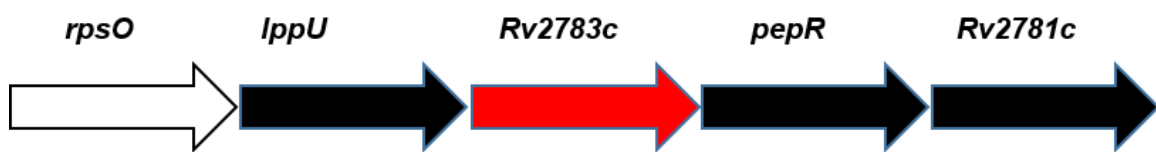

**Figure S2: The *M. tuberculosis* Rv2783c locus and its surrounding genes.** The upstream *lppU* and the downstream *pepR* and *Rv2781c* genes are deemed non-essential for *M. tuberculosis* growth (33).
